# Supplementary material for: Elimination of certain honeybee venom activities by adipokinetic hormone
Source: Research Square preprint supplement (doi:10.21203/rs.3.rs-5758292/v1), 2025-04-10
Supplement: Supplementary file 1 [file ede86f10beba355db93a0f15.docx]

**Supplementary Material**

**Table S1:** Sequences of primers used in RT-qPCR.

| Gene | Direction | Primer Sequence (5´ to 3´) |
| --- | --- | --- |
| *Keap1* | Forward | GAT TTG GAT CGC TGG ACT CTT |
|  | Reverse | CGA AAC CTC CGA TGG CAT AA |
| *Relish* | Forward | AGT GGT CCA AGA GAG AAA G |
|  | Reverse | GAA CAG AGC CGG TCG TAA AT |
| *Nox* | Forward | GAT CTG CGG TGA GAA CAA GAG |
|  | Reverse | CCA ACT CAA TCA GGC GGT ATA G |
| *Eiger* | Forward | GTA TGG GCT ACC ATG GAG ATA TG |
|  | Reverse | CTG TAT TGG TCA CCG TCA AGA |
| *Gadd45* | Forward | ATG GTC GTC GAG GAG AAC T |
|  | Reverse | CTT AGA AGG GCC GAC TTG ATG |
| *Domeless* | Forward | TGG ACT ACG ACT TCC AGT TTA TG |
|  | Reverse | GTT GTT GGT GTT GTA GCT GAT G |
| *rp49* | Forward | ACG TTG TGC ACC AGG AAC TT |
|  | Reverse | CCA GTC GGA TCG ATA TGC TAA |
